# Supplementary material for: Association between Adherence to Swedish Dietary Guidelines and Mediterranean Diet and Risk of Stroke in a Swedish Population
Source: MDPI journal article supplement (doi:10.3390/nu14061253), 2022-03-16
Supplement: s1 [file s1]

## Supplementary materials

**Table S1.** Construction of the modified Mediterranean diet score.

| Diet Component                        | Original Recommendation <sup>1</sup>                      | Serving Size                            | Recommendation in Servings/Week |
|---------------------------------------|-----------------------------------------------------------|-----------------------------------------|---------------------------------|
| <b>Encouraged</b>                     |                                                           |                                         |                                 |
| Fish and seafood                      | ≥3 svg/wk                                                 | Fish: 125g<br>Seafood: 200g             | ≥3 svg/wk                       |
| Fruits and berries                    | ≥3 units/day                                              | 100g <sup>5</sup>                       | ≥21s vg/wk                      |
| Nuts and seeds                        | ≥3 svg/wk                                                 | 30g                                     | ≥3 svg/wk                       |
| Vegetables and legumes                | Vegetables: ≥2 svg/d or ≥1 svg/d raw<br>Legumes: ≥3svg/wk | 300g <sup>4</sup>                       | ≥7 svg/wk                       |
| Vegetable oils <sup>2</sup>           | ≥ 4 tablespoons/d                                         | 13.5g <sup>3</sup>                      | ≥28 svg/wk                      |
| Wine                                  | ≥7 svg/week                                               | 100g                                    | ≥7 svg/wk                       |
| <b>Discouraged</b>                    |                                                           |                                         |                                 |
| Butter, margarine, cream              | <1 svg/d                                                  | 12g                                     | <7 svg/wk                       |
| Red and processed meat                | <1 svg/d                                                  | 125g                                    | <7 svg/wk                       |
| Soda                                  | <1 svg/d                                                  | 200g                                    | <7 svg/wk                       |
| Sweets and confectionary <sup>6</sup> | <3 svg/wk                                                 | Pastries: 50g<br>Sweets, chocolate: 30g | <3 svg/wk                       |

<sup>1</sup>Original recommendations as stated by Martínez-González et al (ref). <sup>2</sup>Vegetable oils is a composite variable of vegetable oils to use in opposition of solid or animal fats for culinary purposes (the original MDS only considered olive oil for this item). <sup>3</sup>One tablespoon = 13.5 g according to Schröder et al 2011 (ref). <sup>4</sup>An average serving size of 300g was established for the pooled vegetable and legume intake to capture the differences I the recommendations established by the original mMDS. <sup>5</sup>The serving sizes for fruit and berry intake in the original MDS were calculated based on their respective carbohydrate content, however we established a standard serving size of 100 g to be used as an average portion size. <sup>6</sup>In the original MDS, this category refers only to commercial or store-bought baked goods, however we were unable to separate home-made from store-bought pastries in MDCS so both types are included in this category.
